# THE AMERICAN JOURNAL OF PSYCHIATRY

---

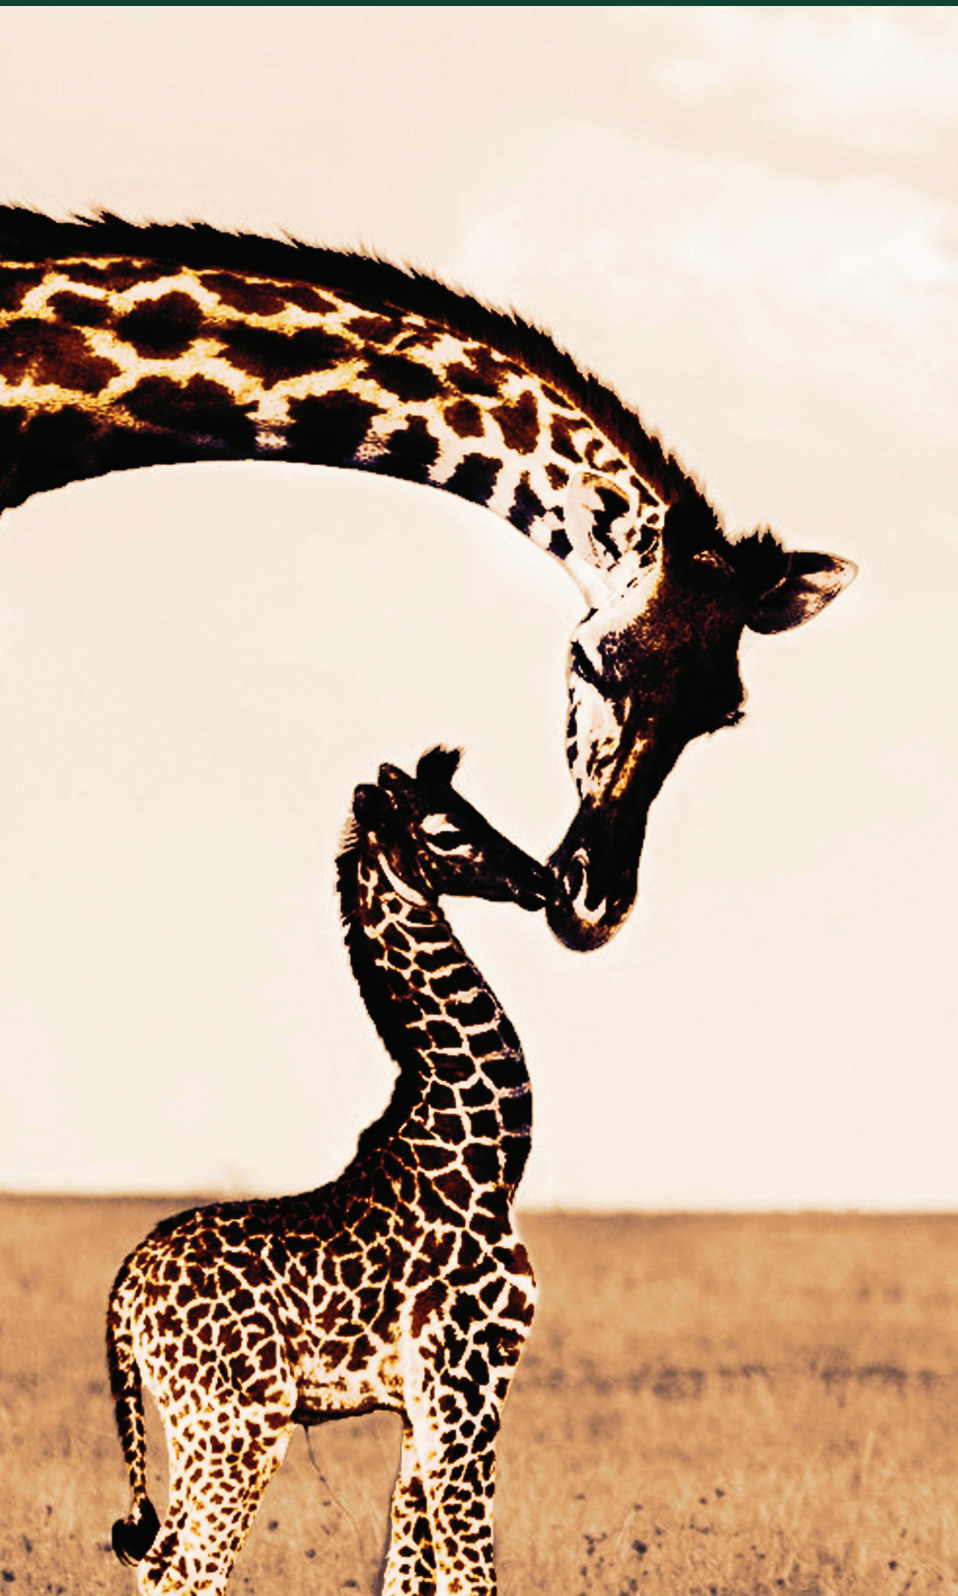

**Interpersonal Psychotherapy for  
Depression: A Meta-Analysis**

Pim Cuijpers, Ph.D., et al.

581

◀ **Children of Depressed Mothers 1  
Year After Remission of Maternal  
Depression: Findings From the  
STAR\*D-Child Study**

Priya Wickramaratne, Ph.D., et al.

593

**A Nationwide Cohort Study of  
Oral and Depot Antipsychotics  
After First Hospitalization for  
Schizophrenia**

Jari Tiihonen, M.D., Ph.D., et al.

603

**Effects of Stress on Decision-  
Making Deficits in Formerly  
Heroin-Dependent Patients After  
Different Durations of Abstinence**

Xiao-li Zhang, M.D., et al.

610

**Continuing Medical Education**

659

**June 2011**

**Volume 168 • Number 6**

---

Official Journal of the  
AMERICAN PSYCHIATRIC ASSOCIATION

---

[ajp.psychiatryonline.org](http://ajp.psychiatryonline.org)
