# get CME from AJP

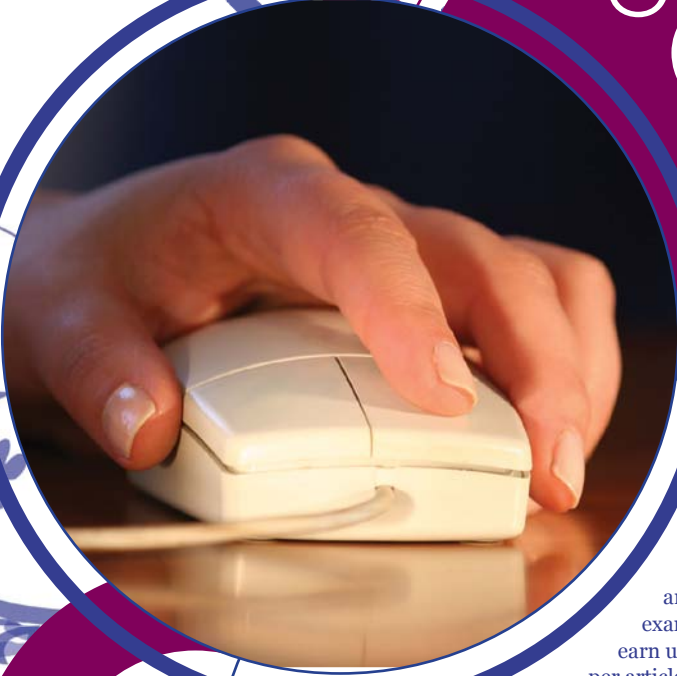

Brief companion exams are created for three of the most influential articles from each issue. By reading the articles and completing the online exams, you can test your knowledge and earn up to 1 *AMA PRA Category 1 Credit™* per article. Correct answers are highlighted for your reference upon completion of the course. A link from the question to the correct answer in context will also be highlighted in the associated article, thus extending the learning experience.

CME credit is only provided online, and a subscription to the AJP CME program is required. From the moment you subscribe to the AJP CME program, you will be able to select from 72 courses from among 40 possible subject areas. You'll also be able to access the next 33 courses as they become available. For more information and pricing, please go to <http://cme.psychiatryonline.org/misc/aboutajpcme.shtml>

This activity is sponsored by the American Psychiatric Association. The American Psychiatric Association is accredited by the Accreditation Council for Continuing Medical Education to provide continuing medical education for physicians. The American Psychiatric Association designates each educational activity for a maximum of 1 *AMA PRA Category 1 Credit™*. Physicians should only claim credit commensurate with the extent of their participation in the activity.

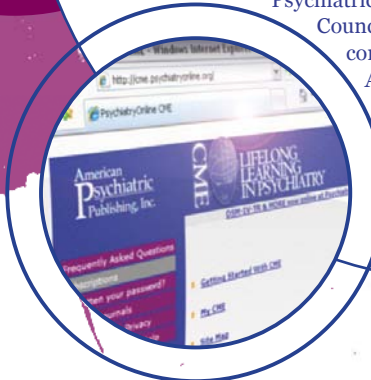

Fulfill your CME requirement while staying current on the latest advances in psychiatry.  
Subscribe to AJP CME!

# The Residents' JOURNAL

*The Residents' JOURNAL* a publication of The American Journal of Psychiatry

May 2011 Volume 6 Issue 5

**Inside**

- 1 In This Issue
- 2 Early Intervention for Schizophrenia, Part 2: A Review  
Karthik Sivashanker, M.D.
- 6 Differential Diagnosis of Psychosis  
Tamer Wassef, M.D.
- 7 A Focus on Learning Disabilities and Psychiatry  
Michael Ascher, M.D.
- 10 Catatonia in an Adolescent Patient With Anti-N-Methyl-D-Aspartate Receptor Encephalitis  
Prachi Agarwala, M.D.
- 12 Treatment in Childhood Trauma  
Nicole Zuber, M.D.
- 14 The Psychiatric Consultation Document  
Jonathan Avery, M.D.
- 16 Letter to the Editor
- 17 Test Your Knowledge
- 18 Residents' Journal Info

*In This Issue*



This issue of *The Residents' Journal* features a section theme on child and adolescent psychiatry. The section begins with a review article by Michael Ascher, M.D., who discusses how childhood learning disabilities are defined in the field of psychiatry as well as the negative sequelae surrounding these disabilities and appropriate intervention. Next, Prachi Agarwala, M.D., presents a case report on a teenage girl who developed catatonia after completing treatment for limbic encephalitis. Finally, in a treatment in psychiatry article, Nicole Zuber, M.D., provides information on the assessment, differential diagnosis, and treatment options for children and adolescents exposed to traumatic events.

Editor-in-Chief  
Joseph M. Cerimele, M.D.

Associate Editor  
Sarah M. Foyad, M.D.

Editors Emeriti  
Sarah B. Johnson, M.D.  
Molly McVoy, M.D.

Guest Section Editor  
Michael Ascher, M.D.

Staff Editor  
Angela Moore

The Residents' Journal accepts manuscripts authored by medical students, resident physicians, and fellows. To submit your paper, please visit the manuscript submission site at [mc.manuscriptcentral.com/appi-ajp](http://mc.manuscriptcentral.com/appi-ajp) and either create an account or use your existing account. For manuscript type, select "Residents." Then follow the instructions to upload your manuscript. Residents who are interested in participating as Guest Section Editors should e-mail the Residents' Journal Editor-in-Chief Joseph Cerimele at [joseph.cerimele@mssm.edu](mailto:joseph.cerimele@mssm.edu).

See the September 2010 issue for details on the new peer review process.

The Residents' Journal is sent free-of-charge to all psychiatry residents. Anyone interested in being included on the distribution list should contact Angela Moore, the Residents' Journal staff editor at [ajp@psych.org](mailto:ajp@psych.org) with "Subscribe to Residents' Journal" in the subject line.

## Upcoming Issue Themes

June: No theme

July: Suicide

To access the complete Residents' Journal archives, visit [ajp.psychiatryonline.org/misc/Residents\\_Journal.dtl](http://ajp.psychiatryonline.org/misc/Residents_Journal.dtl)

# The American Journal of PSYCHIATRY

Latest  
IMPACT  
FACTOR  
12.52!

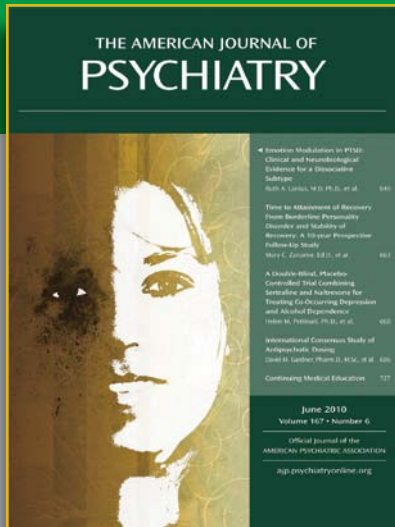

Official Journal of the  
American Psychiatric Association

Edited by Robert Freedman, M.D.

- AJP saw its 2009 Impact Factor rise almost two full points point to reach 12.52, placing it 2nd among the 117 psychiatry journals indexed, while still remaining the far-and-away leader in total citations.
- *The American Journal of Psychiatry* (AJP) is again the #1 journal in psychiatry in terms of immediacy according to Thomson Scientific's Immediacy Index. This important performance metric is calculated by dividing the number of citations to articles published in a given year by the number of articles published in that year.
- The Immediacy Index is a good measure of how quickly a given journal's articles are cited—AJP's #1 placement is a result of publishing articles that are relevant, covering current "hot" topics and cutting-edge research, and getting these findings to the field faster with AJP in Advance, the Journal's online-ahead-of-print publication protocol.
- A recent poll conducted by the BioMedical & Life Sciences Division of The Special Libraries Association identified the 100 most influential journals in all of Biology & Medicine over the last 100 years. *The American Journal of Psychiatry* was among those honored, the only psychiatry/psychology journal represented.

No other psychiatric journal reaches more psychiatrists with greater impact or immediacy than the journal that the overwhelming majority of psychiatrists considers essential: AJP.

ISSN 0002-953X

[ajp.psychiatryonline.org](http://ajp.psychiatryonline.org)

To order a subscription, visit

[www.appi.org](http://www.appi.org).

American  
Psychiatric  
Publishing, Inc.

The First and Last Word in Psychiatry

American Psychiatric Publishing

[www.appi.org](http://www.appi.org) • 1-800-368-5777 • 703-907-7322

Find us on [facebook](#) and [twitter](#) Priority Code AH1036

## Contents

- A19 Editorial Board  
A21 Highlights of this issue

## Editorials

- 417 **Preventive psychiatry: a paradigm to improve population mental health and well-being**  
K. Bhui and S. Dinos
- 420 **Forensic psychiatry and public protection**  
A. Buchanan and A. Grounds

- 423 **Transitional object – 100 words**  
Jeremy Holmes

- 424 **The truth about genetic variation in the serotonin transporter gene and response to stress and medication**  
P. McGuffin, S. Alsabban and R. Uher

- 427 **The Great Asylums of Scotland – poems by doctors**  
Tom Pow

- 428 **Psychological treatments in intellectual disability: the challenges of building a good evidence base**  
S. Bhaumik, S. Gargadharan, A. Hiremath and P. S. S. Russell

## Reappraisal

- 431 **Dangerous and severe personality disorder**  
C. Duggan

## Review article

- 434 **Revascularisation and mortality rates following acute coronary syndromes in people with severe mental illness: comparative meta-analysis**  
A. J. Mitchell and D. Lawrence

## Papers

- 442 **Cannabis use before age 15 and subsequent executive functioning**  
M. A. Fontes, K. I. Bolla, P. J. Cunha, P. P. Almeida, F. Jungerman, R. R. Laranjeira, R. A. Bressan and A. L. T. Lacerda
- 448 **Grey matter and social functioning correlates of glutamatergic metabolite loss in schizophrenia**  
N. Aoyama, J. Théberge, D. J. Drost, R. Manchanda, S. Northcott, R. W. J. Neufeld, R. S. Menon, N. Rajakumar, W. F. Pavlosky, M. Densmore, B. Schaefer and P. C. Williamson
- 457 **MAOA, abuse exposure and antisocial behaviour: 30-year longitudinal study**  
D. M. Fergusson, J. M. Boden, L. J. Horwood, A. L. Miller and M. A. Kennedy
- 464 **Polymorphism of the 5-HT transporter and response to antidepressants: randomised controlled trial**  
G. Lewis, J. Mulligan, N. Wiles, P. Cowen, N. Craddock, M. Ikeda, D. Grozeva, V. Mason, D. Nutt, D. Sharp, D. Tallon, L. Thomas, M. C. O'Donovan and T. J. Peters

- 471 **Insights into humanity – extra**  
Suhanthini Farrell

- 472 **Mixed anxiety and depressive disorder outcomes: prospective cohort study in primary care**  
K. Walters, M. Buszewicz, S. Weich and M. King

- 479 **Age and birth cohort differences in the prevalence of common mental disorder in England: National Psychiatric Morbidity Surveys 1993–2007**  
N. Spiers, P. Bebbington, S. McManus, T. S. Brugha, R. Jenkins and H. Meltzer
- 485 **Trends in rates of mental illness in homicide perpetrators**  
N. Swinson, S. M. Flynn, D. While, A. Roscoe, N. Kapur, L. Appleby and J. Shaw

- 489 **The good psychiatrist in film: *Vincere* (dir. Marco Bellocchio) – psychiatry in the movies**  
Larry Culliford

## Short report

- 490 **Applied behaviour analysis and standard treatment in intellectual disability: 2-year outcomes**  
A. Hassiotis, A. Canagasabay, D. Robotham, L. Marston, R. Romeo and M. King

## Columns

- 492 Correspondence  
495 Corrections  
496 Book reviews  
500 Contents of *Advances in Psychiatric Treatment*  
501 Contents of the *American Journal of Psychiatry*  
502 From the Editor's desk

## Cover picture

Théodore Géricault (1791–1824).  
*Portrait of a Woman with Monomania*  
Or *Envy: the Hyena of the Salpêtrière*

This is one of ten portraits of mental hospital patients made by the French Romantic painter between 1820 and 1824. Not intended for public display, they were painted for his friend Étienne-Jean Georget, a student of Esquirol and chief psychiatrist at the Salpêtrière at the time. Five have been lost but those that remain portray patients with different forms of monomania, a particular interest of Esquirol's and a subject of research by Georget. The other forms of monomania depicted are of delusions of military command, compulsive child kidnapping, kleptomania and compulsive gambling.

Georget's early view of mental illness as a physical disorder of the nervous system later approached that of his mentor Esquirol, who held a broader view which included the usefulness of physiognomy in helping 'to define the character of the ideas and emotions that fuel the lunacy of the mentally ill'. Géricault had already shown an interest in the expression of extreme emotion, visiting Beaujon hospital 'to follow with ardent curiosity all phases of suffering . . . and to study the traces they imprint on the human body' in preparation for his best-known painting, the *Raft of the Medusa*, depicting a contemporary shipwreck.

Géricault had a strong family history of mental illness and had himself experienced depression accompanied by paranoid delusions. During 1819 he was described as believing that bargemen and people on the riverboats were enemies spying on him and plotting his ruin.

The paintings in this series are objective rather than sentimental but show empathy and respect: they appear faithful portraits of each individual rather than romanticised or melodramatic portrayals of the insane. Their meticulous objectivity is in line with the increasing application of medical science to the clinical observation and study of mental illness that was developing. From an art historical perspective, following initial obscurity, they are now regarded as important early works of modern painting.

Text by Sally Browning. Image © Francis G. Mayer/CORBIS.

We are always looking for interesting and visually appealing images for the cover of the *Journal* and would welcome suggestions or pictures, which should be sent to Dr Allan Beveridge, British Journal of Psychiatry, 17 Belgrave Square, London SW1X 8PG, UK or [bjp@rcpsych.ac.uk](mailto:bjp@rcpsych.ac.uk).

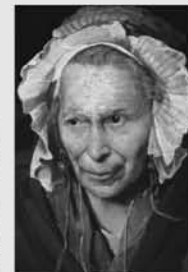

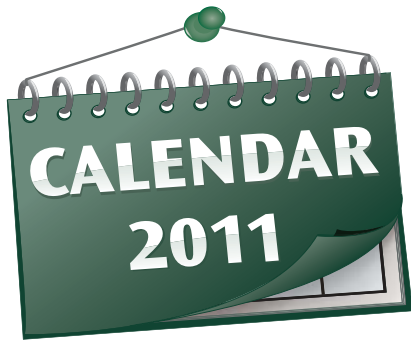

*For free listing of your organization's official annual or regional meeting, please send us the following information: sponsor, location, inclusive dates, type and number of continuing education credits (if available), and the name, address, and telephone number of the person or group to contact for more information. In order for an event to appear in our listing, all notices and changes must be received at least 6 months in advance of the meeting and should be addressed to:*

**Calendar, American Journal of Psychiatry, 1000 Wilson Boulevard, Suite 1825, Arlington, VA 22209-3901, [swstrate@psych.org](mailto:swstrate@psych.org) (e-mail).**

*Because of space limitations, only listings of meetings of the greatest interest to Journal readers will be included.*

---

## JUNE

**June 15–September 15**, Abstract submissions open for May 2012 Annual Meeting of the American Psychiatric Association.

---

## OCTOBER

**October 5–8**, II International Congress, Dual Disorders, Addictive Behaviors and other Mental Disorders, Barcelona, Spain. Contact: SEPD, [www.cipd2011.com](http://www.cipd2011.com) (web site).

**October 18–23**, 58th Annual Meeting of the American Academy of Child and Adolescent Psychiatry, Toronto, Ontario. Contact: AACAP, 3615 Wisconsin Avenue, N.W., Washington, DC 20016-3007; (202) 966-7300 (tel), (202) 966-2891 (fax), [meetings@aacap.org](mailto:meetings@aacap.org) (e-mail), [www.aacap.org](http://www.aacap.org) (web site).

**October 27–30**, 63rd Institute on Psychiatric Services, American Psychiatric Association, San Francisco, CA. Contact: Jill Gruber, APA Annual Meetings Dept., 1000 Wilson Blvd., Ste. 1825, Arlington, VA 22209; (703) 907-7815.

---

## NOVEMBER

**November 1–December 5**, Poster submissions open for May 2012 Annual Meeting of the American Psychiatric Association.

---

## DECEMBER

**December 4–8**, 50th Annual Meeting, American College of Neuropsychopharmacology, Waikaloa Beach, Hawaii. Contact: [acnp@acnp.org](mailto:acnp@acnp.org); (615) 324-2360.

---

## MARCH 2012

**March 21–24**, 23rd Annual Meeting, American Neuropsychiatric Association, New Orleans, La. Contact: (614)447-2077 or visit [www.anpaonline.org](http://www.anpaonline.org) (web site).

---

## MAY 2012

**May 5–9**, 165th Annual Meeting, American Psychiatric Association, Philadelphia, Pa. Contact: APA Annual Meetings Dept., 1000 Wilson Blvd., Ste. 1825, Arlington, VA 22209; (703) 907-7815.

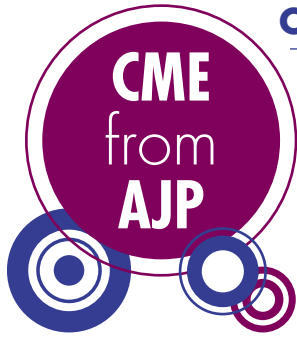

## Continuing Medical Education

Three articles in this issue form the basis of a short course with questions that can be answered for up to 1 *AMA PRA Category 1 Credit™* each by visiting <http://cme.psychiatryonline.org/> and clicking on “American Journal of Psychiatry CME.”

CME credit is issued only online, and a paid subscription to the AJP CME course program is required.

This month's courses appear on pages 659-662.

**FREE AUDIO!**

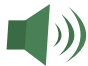

### *Have You Heard?*

You can listen to highlights of *The American Journal of Psychiatry* by downloading a monthly free .mp3 audio file from our web site (<http://ajp.psychiatryonline.org/misc/audio.dtl>) or by subscribing to the AJP Audio podcast at iTunes or other feed reader (e.g., NewzCrawler, FeedDemon, Bloglines, Google Reader). Presented by Deputy Editor Dr. Susan Schultz or by Editorial Director Michael Roy, each month's audio lasts approximately 30 minutes and covers several research articles, the Treatment in Psychiatry feature, and one or two editorials.

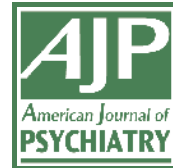

**Coming in the July 2011 issue\***

## THE AMERICAN JOURNAL OF PSYCHIATRY

### **Combining Medications to Enhance Depression Outcomes (CO-MED): Acute and Long-Term Outcomes of a Single-Blind Randomized Study**

A.J. Rush, M.H. Trivedi, J.W. Stewart, A.A. Nierenberg, M. Fava, B.T. Kurian, D. Warden, D.W. Morris, J.F. Luther, M.M. Husain, I.A. Cook, R.C. Shelton, I.M. Lesser, S.G. Kornstein, and S.R. Wisniewski

### **Effectiveness of Switching From Antipsychotic Polypharmacy to Monotherapy**

S.M. Essock, N.R. Schooler, T.S. Stroup, J.P. McEvoy, I. Rojas, C. Jackson, N.H. Covell, and The Schizophrenia Trials Network

### **Gabapentin Combined With Naltrexone for the Treatment of Alcohol Dependence**

R.F. Anton, H. Myrick, T.M. Wright, P.K. Latham, A.M. Baros, L.R. Waid, and P.K. Randall

### **Association of Predeployment Gaze Bias for Emotion Stimuli With Later Symptoms of PTSD and Depression in Soldiers Deployed in Iraq**

C.G. Beevers, H.-J. Lee, T.T. Wells, A.J. Ellis, and M.J. Telch

\*Can't wait? Visit [ajp.psychiatryonline.org](http://ajp.psychiatryonline.org) and click the “AJP in Advance” logo to see all articles uploaded in advance of print!
